# Supplementary material for: Field-induced slow magnetic relaxation of two 1-D compounds containing six-coordinated cobalt(ii) ions: influence of the coordination geometry
Source: Royal Society of Chemistry journal article supplement (doi:10.1039/c8qi00388b), 2018-01-01
Supplement: c8qi00388b1.pdf [file c8qi00388b1.pdf]

## Supporting Information for

# Field-Induced Slow Relaxation of Two 1-D Compounds Containing Six-coordinated Cobalt(II) Ions: Influence of the Coordination Geometry

*Zhiwei Chen<sup>a‡</sup>, Lei Yin<sup>c‡</sup>, Xiuna Mi<sup>a</sup>, Suna Wang<sup>\*a</sup>, Fan Cao<sup>\*b</sup>, Zhenxing*

*Wang<sup>\*c</sup>, Yunwu Li<sup>a</sup>, Jing Lu<sup>a</sup>, Jianmin Dou<sup>a</sup>*

<sup>a</sup>Shandong Provincial Key Laboratory of Chemical Energy Storage and Novel Cell  
Technology, School of Chemistry and Chemical Engineering, Liaocheng University,  
Liaocheng, 252059, P. R. China.

<sup>b</sup>Qingdao University of Science & Technology, College of Chemistry and Molecular  
Engineering, 266042, P. R. China.

<sup>c</sup>Wuhan National High Magnetic Field Center & School of Physics, Huazhong  
University of Science and Technology, Wuhan, Hubei, 430074, P.R. China.

## Table of contents.

**Table S1.** The selected bond lengths and angles of compounds **1** and **2**.

**Table S2** .Results of Continuous Shape Measure Analysis for  $\text{CoO}_4\text{N}_2^{2+}$  units in compounds **1** and **2**<sup>a</sup>

**Table S3.** The relaxation fitting parameters from Least-Squares Fitting of  $\chi(\omega)$  data for compound **1** from 2.2 to 6.0 K under 2 kOe dc field.

**Table S4.** The relaxation fitting parameters from Least-Squares Fitting of  $\chi(\omega)$  data for compound **2** from 2.2 to 6.0 K under 2 kOe dc field.

**Fig. S1** (a) View of the 3-D supramolecular structure of compound **1** along the c axis, showing the  $\pi \cdots \pi$  interactions between the aromatic rings of the neighboring chains. (b) The C-H $\cdots$ O interactions between neighboring chains.

**Fig. S2** (a) View of the 3-D supramolecular structure of compound **2** along the a axis. (b) View of hydrogen bonding interactions between the carboxylate oxygen atoms of the uncoordinated L2 ligand and coordinated aqua molecules of the neighboring chains along the ab plane.

**Fig.S3** The temperature dependence of the in-phase ( $\chi'$ ) and out-of-phase ( $\chi''$ ) ac susceptibilities at different frequencies with zero dc field for compounds **1**(a) and **2** (b), respectively.

**Fig.S4** Arrhenius plots of relaxation times of **1** under 2000 Oe dc field, the data was collected from the peaks of  $\chi''$  (out-of-phase) against frequency at different temperature.

**Fig. S5** Plots of  $\ln(\chi''/\chi')$  versus  $1/T$  of compound **2**. The solid lines represent the fitting results.

**Fig. S6** HF-EPR spectra of compounds **1** (a) and **2** (b) at 4.2 K and various frequencies. The spectra are offset in proportion to the frequency. Black dots represent the resonance fields for each spectrum.

**Table S1.** The selected bond lengths and angles of compounds **1** and **2**.

| <b>Compound 1</b> |            |                  |            |
|-------------------|------------|------------------|------------|
| Co(1)-O(1)        | 2.076(3)   | N(1)-Co(1)-N(2)  | 77.43(17)  |
| Co(1)-O(2)        | 2.197(3)   | O(4)-Co(1)-O(2)  | 102.40(12) |
| Co(1)-O(3)        | 2.212(3)   | O(1)-Co(1)-O(2)  | 61.04(12)  |
| Co(1)-O(4)        | 2.065(3)   | N(1)-Co(1)-O(2)  | 149.69(15) |
| Co(1)-N(1)        | 2.099(5)   | O(1)-Co(1)-O(3)  | 102.31(12) |
| Co(1)-N(2)        | 2.100(4)   | N(1)-Co(1)-O(3)  | 91.62(14)  |
| O(4)-Co(1)-O(1)   | 152.33(12) | N(2)-Co(1)-O(2)  | 88.50(15)  |
| O(4)-Co(1)-N(1)   | 105.98(16) | O(4)-Co(1)-O(3)  | 61.15(12)  |
| O(1)-Co(1)-N(1)   | 95.96(16)  | N(2)-Co(1)-O(3)  | 152.93(15) |
| O(4)-Co(1)-N(2)   | 97.78(14)  | O(2)-Co(1)-O(3)  | 111.48(11) |
| O(1)-Co(1)-N(2)   | 103.39(14) |                  |            |
| <b>Compound 2</b> |            |                  |            |
| Co(1)-O(4)        | 2.059(4)   | O(4)-Co(1)-N(2)  | 89.93(18)  |
| Co(1)-O(4)        | 2.059(4)   | O(4)-Co(1)-N(2)  | 90.07(18)  |
| Co(1)-O(5)        | 2.127(4)   | O(5)-Co(1)-N(2)  | 86.35(14)  |
| Co(1)-O(5)        | 2.127(4)   | O(5)-Co(1)-N(2)  | 93.65(14)  |
| Co(1)-N(2)        | 2.183(4)   | O(4)-Co(1)-N(2)  | 90.07(18)  |
| Co(1)-N(2)        | 2.183(4)   | O(4)-Co(1)-N(2)  | 89.93(18)  |
| O(4)-Co(1)-O(4)   | 180.000(1) | O(5)-Co(1)-N(2)  | 93.65(14)  |
| O(4)-Co(1)-O(5)   | 91.33(18)  | O(5)-Co(1)-N(2)  | 86.35(14)  |
| O(4)-Co(1)-O(5)   | 88.67(17)  | N(2)-Co(1)-N(2)  | 180.000(1) |
| O(4)-Co(1)-O(5)   | 88.67(18)  | C(14)-N(2)-Co(1) | 120.3(4)   |
| O(4)-Co(1)-O(5)   | 91.33(18)  | C(15)-N(2)-Co(1) | 134.2(3)   |
| O(5)-Co(1)-O(5)   | 180        |                  |            |

**Table S2** .Results of Continuous Shape Measure Analysis for  $\text{CoO}_4\text{N}_2^{2+}$  units in compounds **1** and **2**<sup>a</sup>

| Geometry          | HP-6   | PPY-6  | OC-6  | TPR-6  | JPPY-6 | configuration              |
|-------------------|--------|--------|-------|--------|--------|----------------------------|
| <b>Compound 1</b> | 32.111 | 18.693 | 6.818 | 7.269  | 22.673 | Intermediate<br>OC-6/TPR-6 |
| <b>Compound 2</b> | 31.424 | 29.163 | 0.134 | 16.266 | 32.386 | OC-6                       |

<sup>a</sup> The values are Continuous Shape Measure (CShM) parameters and CShM=0 for the ideal geometry and increases with the degree of distortion; HP-6 corresponds to the hexagon geometry; PPY-6 corresponds to the pentagonal pyramid geometry; OC-6 corresponds to the octahedron geometry; TPR-6 corresponds to the trigonal prism geometry; JPPY-6 corresponds to the Johnson pentagonal pyramid (J2) geometry.

**Table S3.** The relaxation fitting parameters from Least-Squares Fitting of  $\chi(\omega)$  data for compound **1** from 2.2 to 6.0 K under 2 kOe dc field.

| $T$ | $\chi_s$                | $\chi_T$ | $\tau$                 | $\alpha$               |
|-----|-------------------------|----------|------------------------|------------------------|
| 2.2 | 0.0195                  | 0.856    | 0.00161                | 0.192                  |
| 2.4 | 0.0203                  | 0.808    | 0.00130                | 0.181                  |
| 2.6 | 0.0171                  | 0.766    | 0.00103                | 0.175                  |
| 2.8 | 0.0158                  | 0.725    | 0.000793               | 0.165                  |
| 3.0 | 0.0117                  | 0.687    | 0.000592               | 0.159                  |
| 3.5 | $0.330 \times 10^{-9}$  | 0.608    | 0.000270               | 0.165                  |
| 4.0 | $0.470 \times 10^{-9}$  | 0.543    | 0.000126               | 0.165                  |
| 4.5 | $0.898 \times 10^{-9}$  | 0.489    | $0.653 \times 10^{-4}$ | 0.135                  |
| 5.0 | $0.162 \times 10^{-10}$ | 0.443    | $0.375 \times 10^{-4}$ | 0.0776                 |
| 5.5 | $0.225 \times 10^{-9}$  | 0.404    | $0.233 \times 10^{-4}$ | 0.0201                 |
| 6.0 | $0.725 \times 10^{-22}$ | 0.372    | $0.145 \times 10^{-4}$ | $0.46 \times 10^{-15}$ |

**Table S4.** The relaxation fitting parameters from Least-Squares Fitting of  $\chi(\omega)$  data for compound **2** from 2.2 to 6.0 K under 2 kOe dc field.

| $T$ | $\chi_s$                | $\chi_T$ | $\tau$                 | $\alpha$ |
|-----|-------------------------|----------|------------------------|----------|
| 2.2 | $0.169 \times 10^{-14}$ | 0.772    | $0.569 \times 10^{-4}$ | 0.155    |
| 2.6 | $0.253 \times 10^{-14}$ | 0.692    | $0.438 \times 10^{-4}$ | 0.118    |
| 3.0 | $0.263 \times 10^{-15}$ | 0.624    | $0.337 \times 10^{-4}$ | 0.102    |
| 3.5 | $0.323 \times 10^{-15}$ | 0.551    | $0.258 \times 10^{-4}$ | 0.0728   |
| 4.0 | $0.707 \times 10^{-15}$ | 0.492    | $0.201 \times 10^{-4}$ | 0.0588   |
| 5.0 | $0.952 \times 10^{-15}$ | 0.403    | $0.134 \times 10^{-4}$ | 0.0355   |
| 6.0 | $0.158 \times 10^{-14}$ | 0.341    | $0.102 \times 10^{-4}$ | 0.00322  |

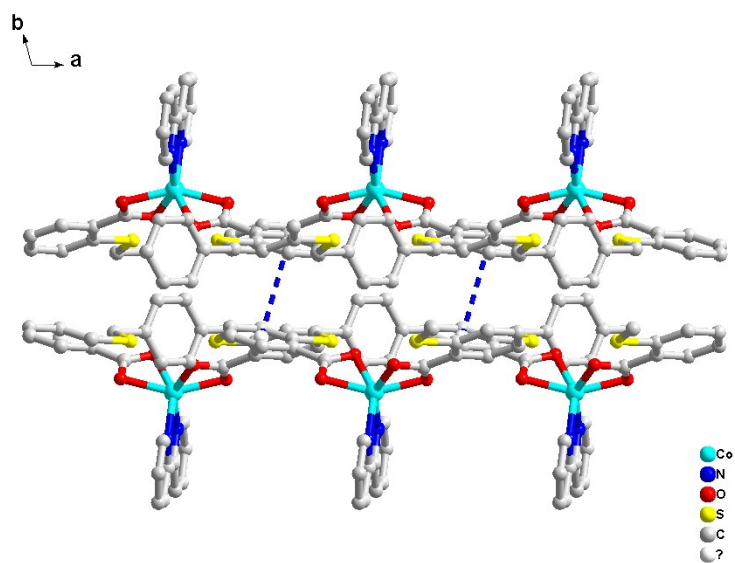

(a)

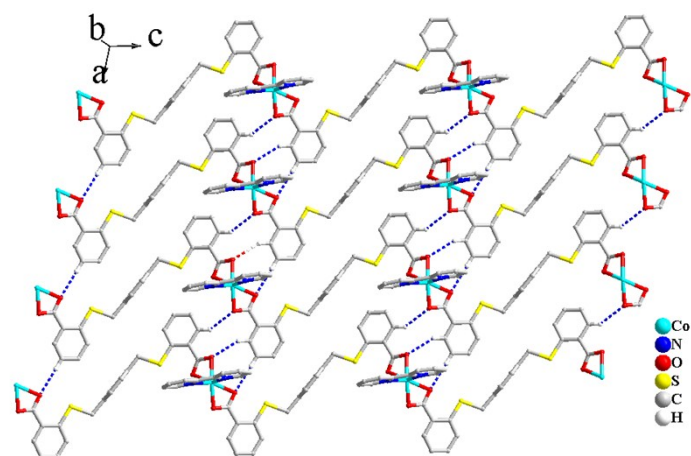

(b)

**Fig. S1** (a) View of the 3-D supramolecular structure of compound **1** along the c axis, showing the  $\pi \cdots \pi$  interactions between the aromatic rings of the neighboring chains. (b) The C-H $\cdots$ O interactions between neighboring chains.

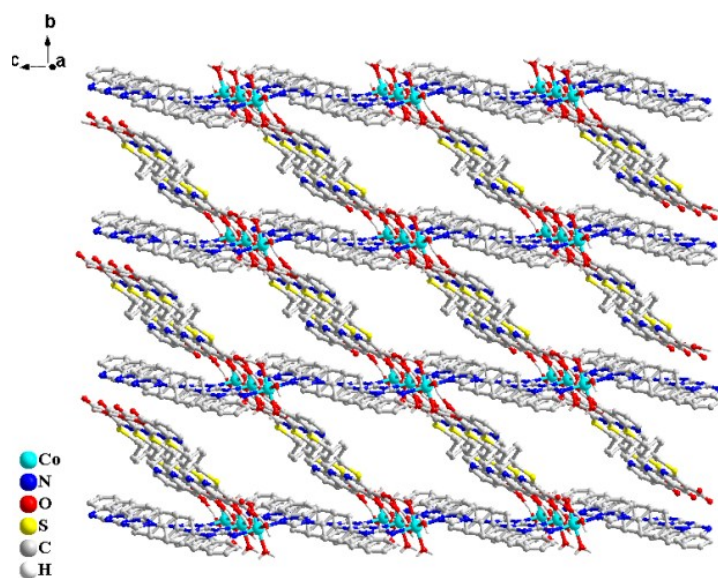

(a)

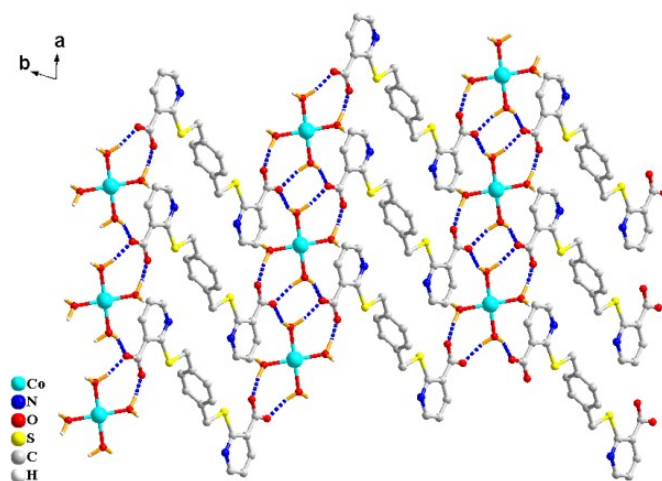

(b)

**Fig. S2** (a) View of the 3-D supramolecular structure of compound **2** along the a axis. (b) View of hydrogen bonding interactions between the carboxylate oxygen atoms of the uncoordinated L2 ligand and coordinated aqua molecules of the neighboring chains along the ab plane.

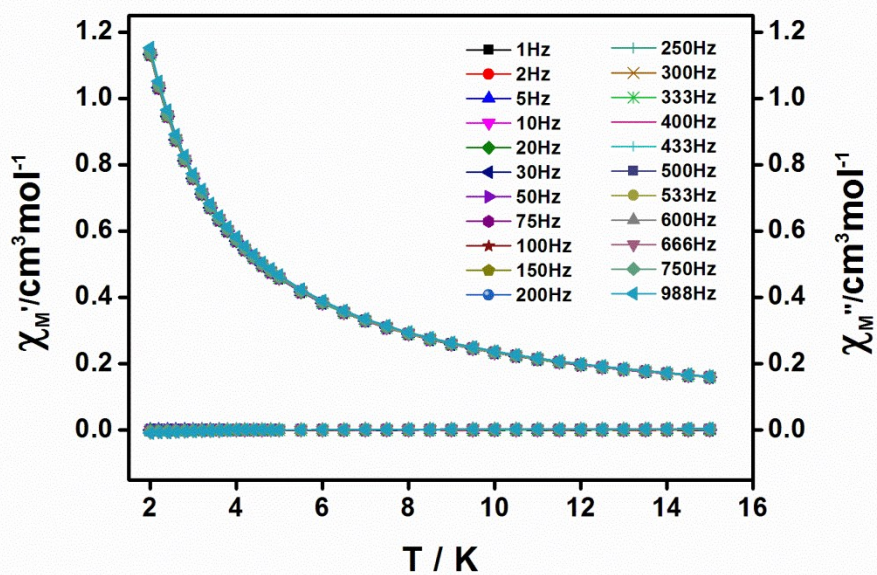

(a)

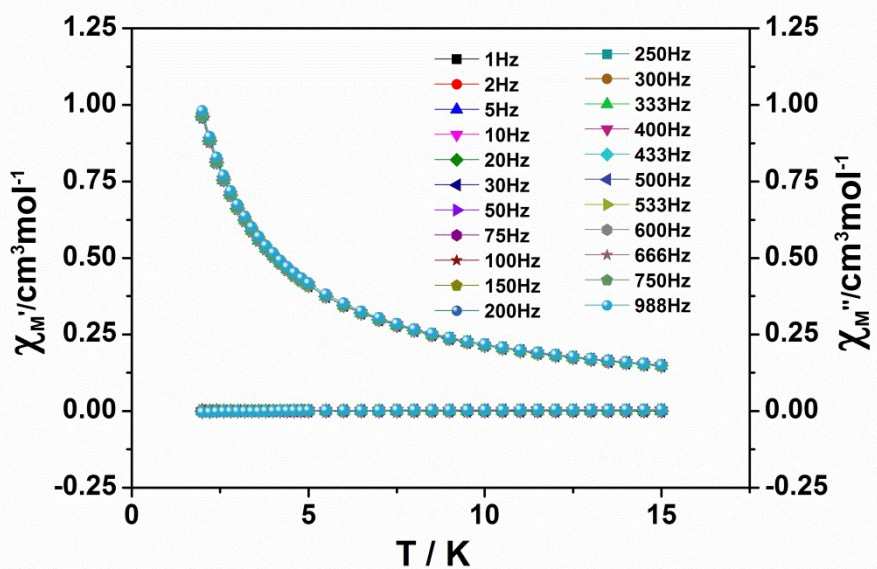

(b)

**Fig.S3** The temperature dependence of the in-phase ( $\chi'$ ) and out-of-phase ( $\chi''$ ) ac susceptibilities at different frequencies with zero dc field for compounds 1(a) and 2 (b), respectively.



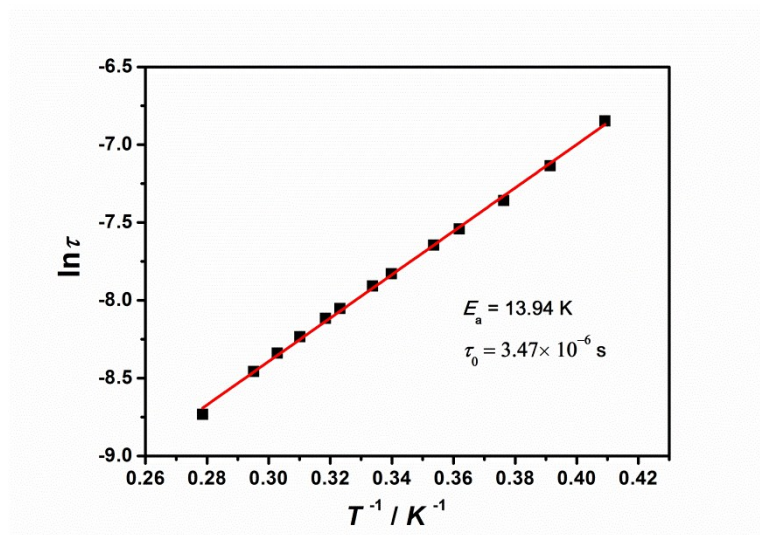

**Fig.S4** Arrhenius plots of relaxation times of **1** under 2000 Oe dc field, the data was collected from the peaks of  $\chi''$  (out-of-phase) against frequency at different temperature.

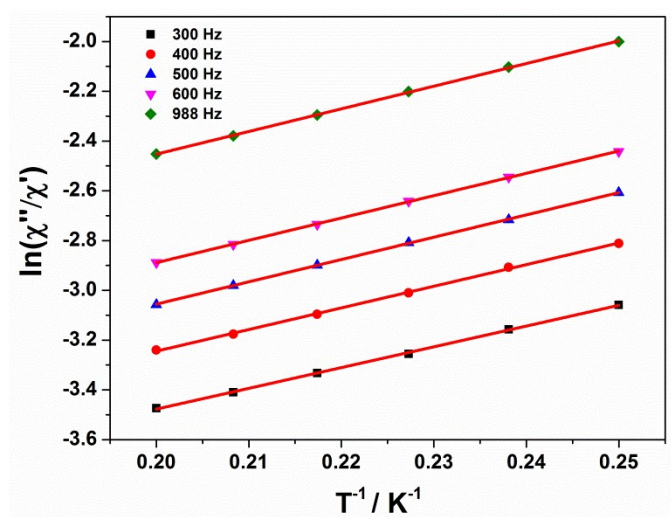

**Fig. S5** Plots of  $\ln(\chi''/\chi')$  versus  $1/T$  of compound **2**. The solid lines represent the fitting results.



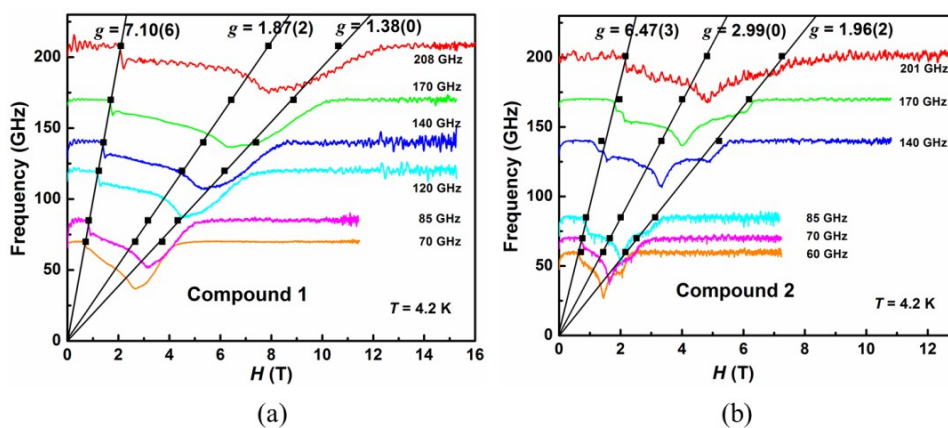

**Fig. S6** HF-EPR spectra of compounds 1 (a) and 2 (b) at 4.2 K and various frequencies. The spectra are offset in proportion to the frequency. Black dots represent the resonance fields for each spectrum.
